# Supplementary material
Source: ML conference proceedings conference paper supplement (https://openaccess.thecvf.com/content/CVPR_2019/html/Li_Data-Driven_Neuron_Allocation_CVPR_2019_paper.html)
Supplement: Supplementary file 1 [file Li_Data-Driven_Neuron_Allocation_CVPR_2019_supplemental.pdf]

## Supplementary Material

### A. Training Curves on ImageNet

Figure 1 compares the top-1 error rate of ResNets and ScaleNets on both ImageNet training and validation dataset. It has been shown that ScaleNets achieve much lower error rates than their counterpart ResNets during all training phase.

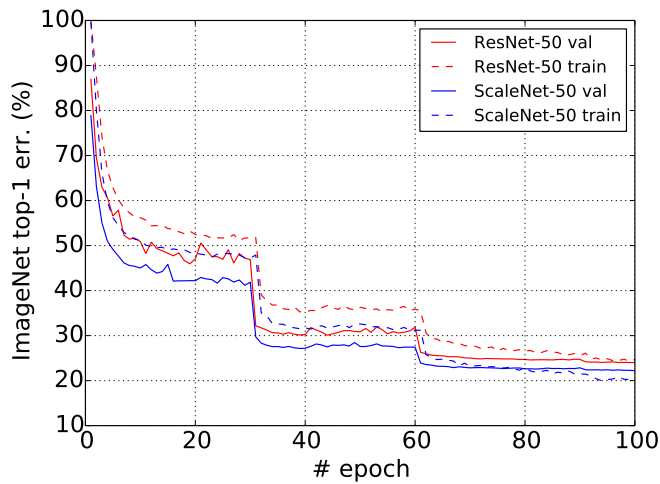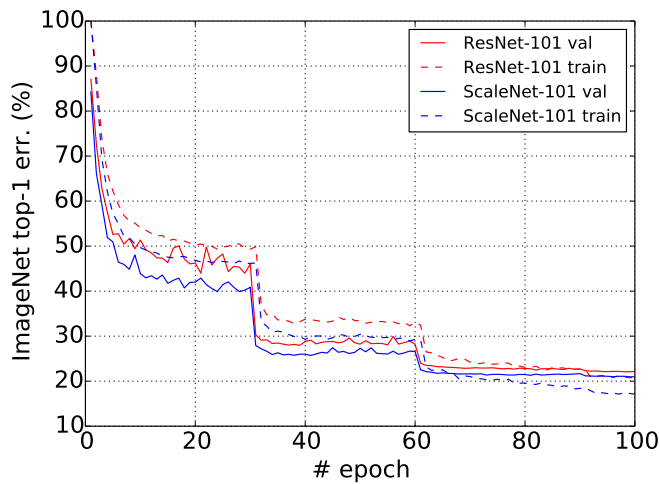

Figure 1: Comparison of the training curves. The left compares scale ScaleNet-50 and ResNet-50 on ImageNet training set and validation set, while the right compares ScaleNet-101 and ResNet-101.

### B. Allocated Neuron Numbers of ScaleNets

Table 1 lists the detailed allocated neuron numbers of  $3 \times 3$  conv in SA block on ImageNet and CIFAR-100.

| block index | ScaleNets for CIFAR-100 |           |            | ScaleNets for ImageNet |               |               |               |
|-------------|-------------------------|-----------|------------|------------------------|---------------|---------------|---------------|
|             | 38 layers               | 56 layers | 101 layers | 50 layers (light)      | 50 layers     | 101 layers    | 152 layers    |
| 1           | 6,2,14                  | 14,6,3    | 10,6,7     | 30,8,10,16             | 62,9,5,12     | 61,11,7,7     | 39,27,10,14   |
| 2           | 15,6,1                  | 10,10,3   | 5,5,13     | 30,9,9,16              | 55,27,5,1     | 56,23,4,3     | 45,32,8,5     |
| 3           | 16,5,1                  | 9,3,11    | 8,4,11     | 30,27,7,0              | 59,26,0,3     | 59,24,3,0     | 46,36,8,0     |
| 4           | 16,6,0                  | 11,3,9    | 12,8,3     | 59,55,13,1             | 125,41,6,3    | 123,41,1,6    | 55,26,35,63   |
| 5           | 30,12,1                 | 14,9,0    | 11,6,6     | 59,43,8,18             | 90,39,9,37    | 126,38,1,6    | 89,44,19,27   |
| 6           | 24,15,4                 | 15,8,0    | 9,9,5      | 59,57,12,0             | 106,56,4,9    | 127,41,3,0    | 93,62,14,10   |
| 7           | 26,16,1                 | 28,15,3   | 9,11,3     | 59,59,9,1              | 116,56,3,0    | 127,41,3,0    | 110,43,12,14  |
| 8           | 27,13,3                 | 26,13,7   | 13,8,2     | 117,65,71,3            | 223,71,55,0   | 220,86,35,0   | 109,54,13,3   |
| 9           | 47,17,22                | 29,15,2   | 12,9,2     | 107,16,33,100          | 196,104,44,5  | 186,64,55,36  | 119,59,0,1    |
| 10          | 30,38,18                | 26,16,4   | 15,8,0     | 111,49,62,34           | 195,98,52,4   | 156,25,53,107 | 106,70,3,0    |
| 11          | 26,52,8                 | 30,14,2   | 16,7,0     | 106,61,61,28           | 155,128,66,0  | 191,44,52,54  | 114,65,0,0    |
| 12          | 23,51,12                | 12,25,9   | 30,14,2    | 99,71,59,27            | 134,129,86,0  | 181,53,83,24  | 224,102,31,1  |
| 13          |                         | 50,19,22  | 23,14,9    | 76,50,67,63            | 120,127,98,4  | 221,82,34,4   | 163,49,68,78  |
| 14          |                         | 52,34,5   | 28,14,4    | 141,182,189,0          | 237,354,106,0 | 177,62,90,12  | 115,65,73,105 |
| 15          |                         | 25,47,19  | 23,15,8    | 83,9,185,235           | 172,435,90,0  | 130,75,102,34 | 143,107,71,37 |
| 16          |                         | 24,59,8   | 26,17,3    | 77,16,184,235          | 138,462,97,0  | 206,71,55,9   | 144,97,92,25  |
| 17          |                         | 17,57,17  | 26,16,4    |                        |               | 203,83,53,2   | 195,87,60,16  |
| 18          |                         | 2,58,31   | 21,22,3    |                        |               | 207,73,54,7   | 198,77,62,21  |
| 19          |                         |           | 24,22,0    |                        |               | 245,84,12,0   | 168,139,43,8  |
| 20          |                         |           | 19,18,9    |                        |               | 221,103,17,0  | 80,80,71,127  |
| 21          |                         |           | 28,18,0    |                        |               | 221,100,20,0  | 138,88,93,39  |
| 22          |                         |           | 22,20,4    |                        |               | 158,99,84,0   | 107,93,65,93  |
| 23          |                         |           | 53,15,24   |                        |               | 220,106,15,0  | 230,103,25,0  |
| 24          |                         |           | 30,43,19   |                        |               | 173,92,73,3   | 182,132,40,4  |
| 25          |                         |           | 61,27,4    |                        |               | 135,122,84,0  | 179,114,53,12 |
| 26          |                         |           | 52,35,5    |                        |               | 109,71,132,29 | 220,76,53,9   |
| 27          |                         |           | 42,45,5    |                        |               | 147,94,93,7   | 227,118,13,0  |
| 28          |                         |           | 43,45,4    |                        |               | 191,108,42,0  | 196,110,51,1  |
| 29          |                         |           | 43,47,2    |                        |               | 127,95,113,6  | 232,118,8,0   |
| 30          |                         |           | 6,50,36    |                        |               | 203,117,21,0  | 224,114,20,0  |
| 31          |                         |           | 4,51,37    |                        |               | 282,377,23,0  | 214,100,43,1  |
| 32          |                         |           | 22,57,13   |                        |               | 279,388,15,0  | 139,114,97,8  |
| 33          |                         |           | 9,60,23    |                        |               | 84,442,155,1  | 198,113,47,0  |
| 34          |                         |           |            |                        |               |               | 151,87,115,5  |
| 35          |                         |           |            |                        |               |               | 171,103,83,1  |
| 36          |                         |           |            |                        |               |               | 172,104,72,10 |
| 37          |                         |           |            |                        |               |               | 205,88,65,0   |
| 38          |                         |           |            |                        |               |               | 170,122,64,2  |
| 39          |                         |           |            |                        |               |               | 170,98,81,9   |
| 40          |                         |           |            |                        |               |               | 223,101,32,2  |
| 41          |                         |           |            |                        |               |               | 192,114,52,0  |
| 42          |                         |           |            |                        |               |               | 112,99,134,13 |
| 43          |                         |           |            |                        |               |               | 109,116,130,3 |
| 44          |                         |           |            |                        |               |               | 110,90,118,40 |
| 45          |                         |           |            |                        |               |               | 194,115,49,0  |
| 46          |                         |           |            |                        |               |               | 178,135,45,0  |
| 47          |                         |           |            |                        |               |               | 209,135,14,0  |
| 48          |                         |           |            |                        |               |               | 341,368,6,0   |
| 49          |                         |           |            |                        |               |               | 363,348,4,0   |
| 50          |                         |           |            |                        |               |               | 311,398,6,0   |

Table 1: Learned neuron numbers in each SA block in ScaleNets on CIFAR-100 and ImageNet. These numbers indicates the output channel numbers for scale 1, 2, 3, and 4 (e.g.  $3 \times 3 \text{ conv}_{[C_1, C_2, C_3, C_4]}$  in Table ??). Note that ScaleNets on CIFAR-100 have only three scales.
